# Supplementary material for: Asset exposure data for global physical risk assessment
Source: Copernicus journal article supplement (doi:10.5194/essd-12-817-2020), 2020-04-09
Supplement: Supplementary file 1 [file essd-12-817-2020-supplement.zip]

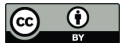

## *Supplement of*

# **Asset exposure data for global physical risk assessment**

**Samuel Eberenz et al.**

*Correspondence to:* Samuel Eberenz (eberenz@posteo.eu)

- `essd-12-817-2020-supplement-title-page.pdf`
- `README_Supplement.txt`
- `Table_S1_country_metadata.csv`
- `Table_S2_Plotdata_Fig5_MEX_nGRP.csv`
- `__MACOSX`
  - `._README_Supplement.txt`
  - `._Table_S1_country_metadata.csv`
  - `._Table_S2_Plotdata_Fig5_MEX_nGRP.csv`

The copyright of individual parts of the supplement might differ from the CC BY 4.0 License.
